# Supplementary material
Source: Springer Nature journal article supplement (https://www.springermedizin.de/resource/supplementary/12985_2013_2545_MOESM2_ESM.pdf/9606942)

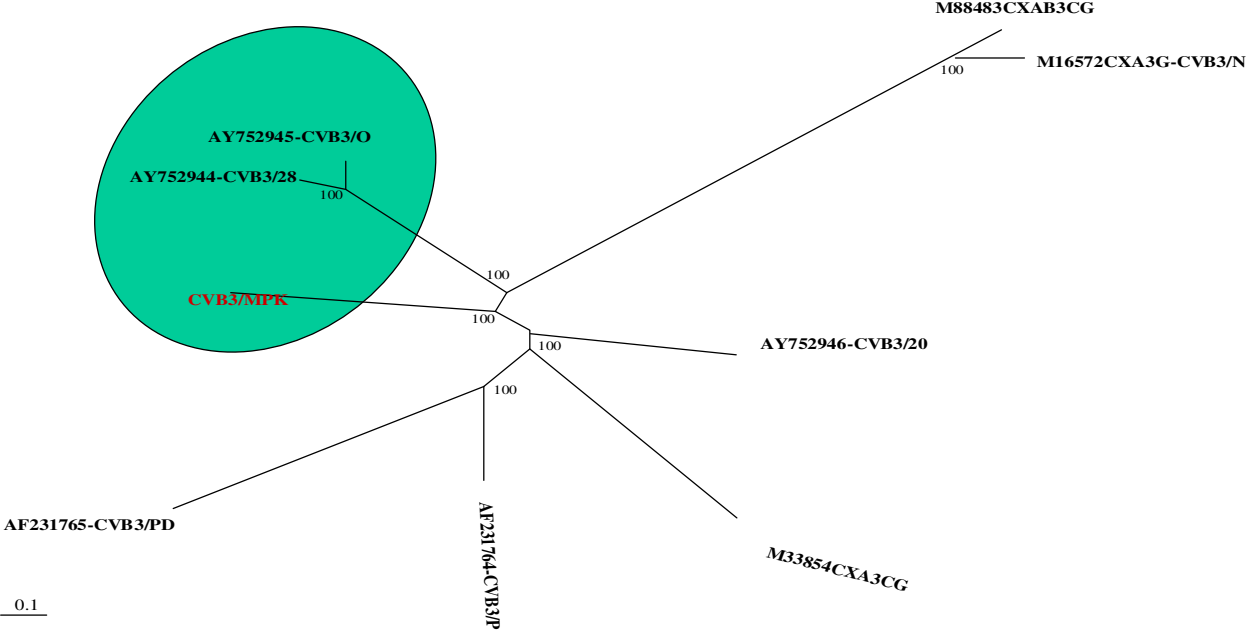

Supplement: MOESM2 [file 9606942]
